# Supplementary material
Source: PubMed Central journal article supplement (PMC2688546)

Figure S1.

A. In U2OS + LULL1-myc

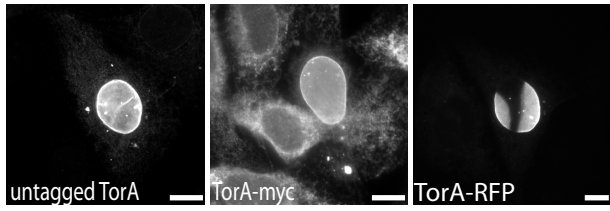

B. In U2OS

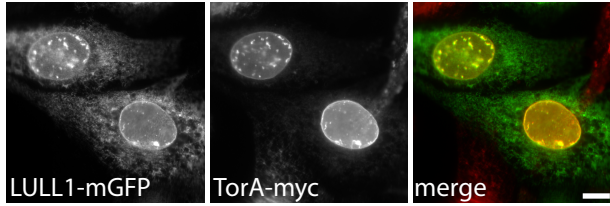

Figure S2.

A.  $\Delta$ GAG-TorA in U2OS + LULL1-myc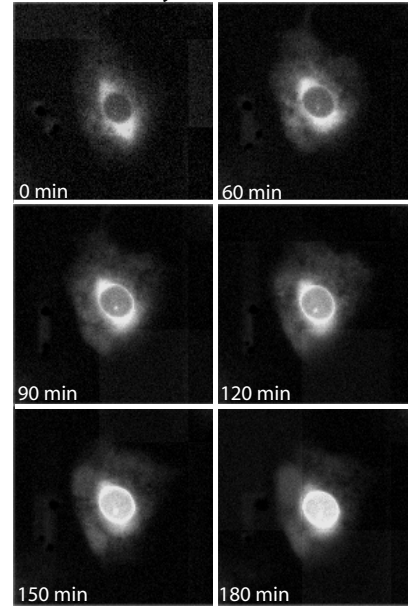B.  $\Delta$ GAG-TorA in U2OS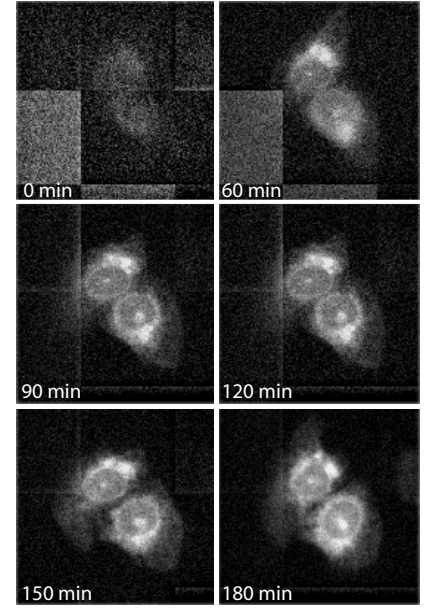

Figure S3.

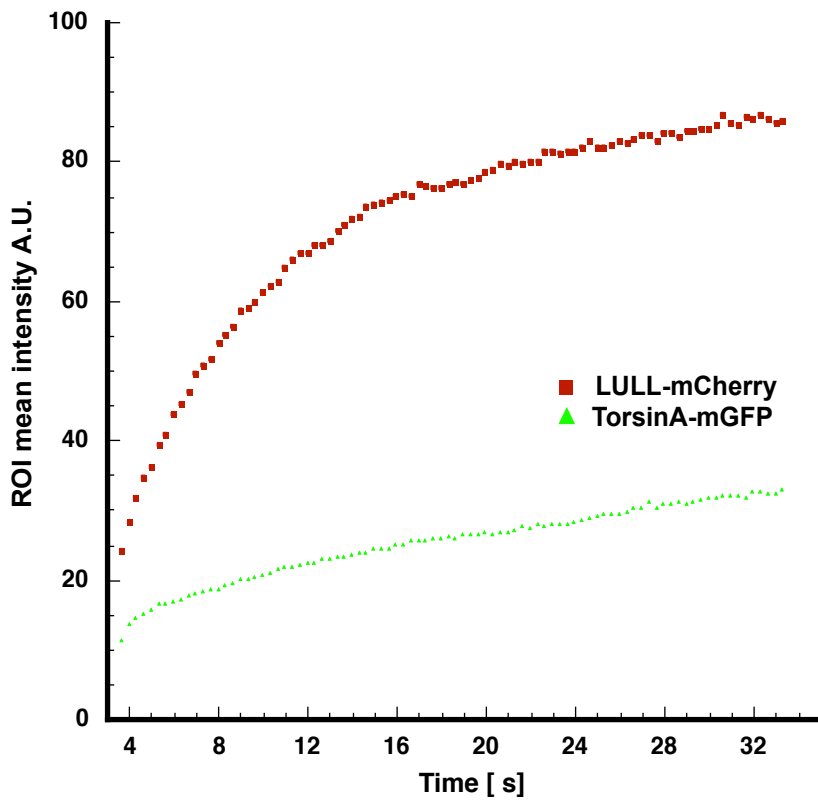

Figure S4.

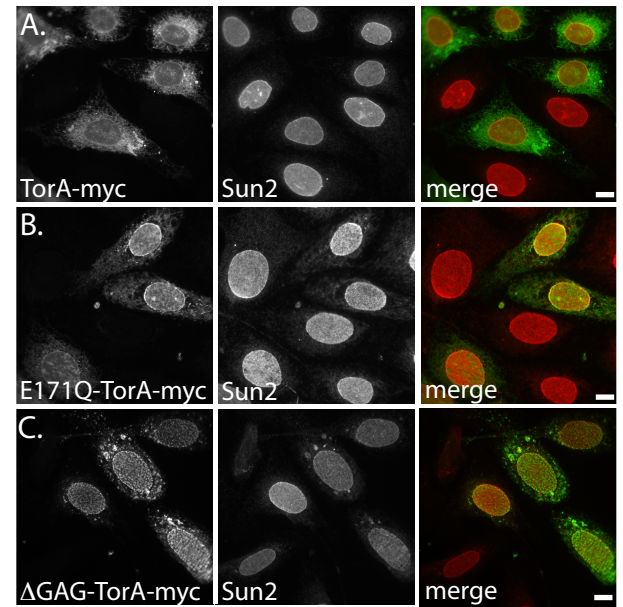

Supplement: E09-01-0094_1.pdf [file E09-01-0094_1.pdf]
